# Supplementary material for: Bone marrow mesenchymal stem cell-derived exosomal microRNA regulates microglial polarization
Source: PeerJ journal article supplement (doi:10.7717/peerj.16359), 2023-11-09

**A**

Mimics NC

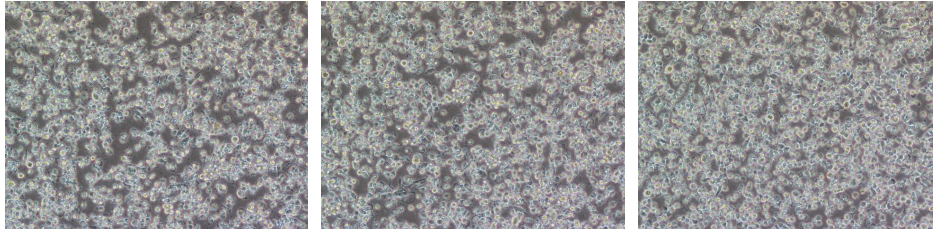

Mimics

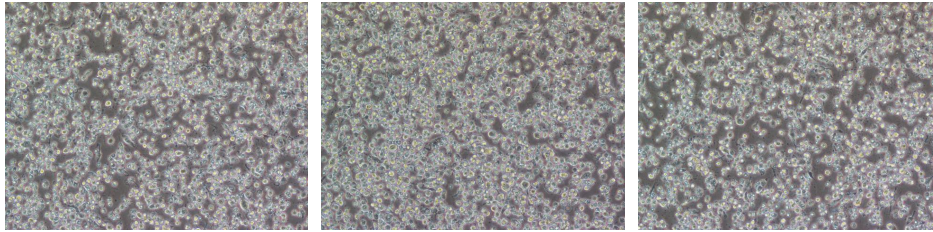

Inhibitor NC

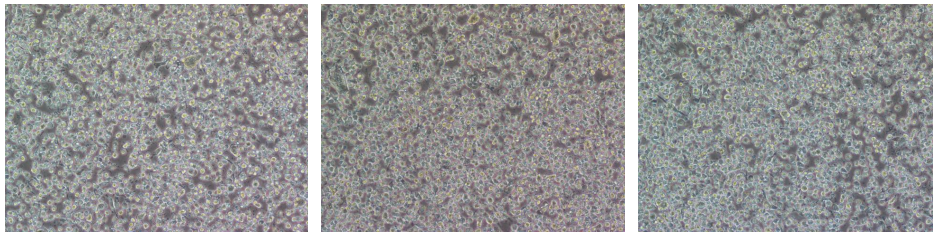

Inhibitor

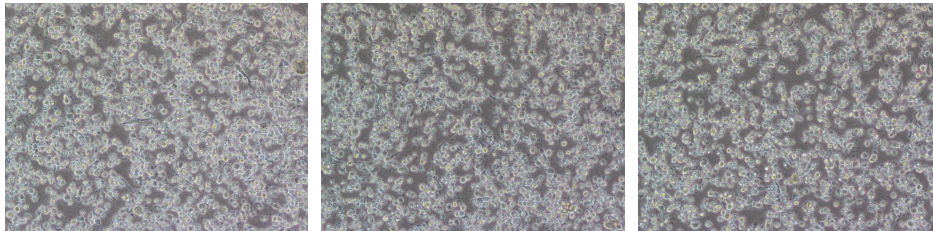

**B**

**CD40**

Mimics NC

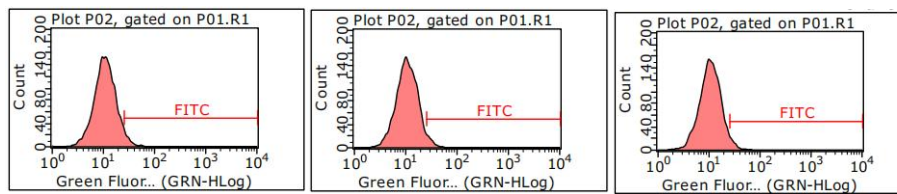

Mimics

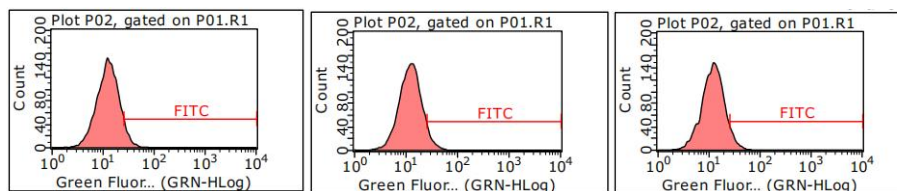

Inhibitor NC

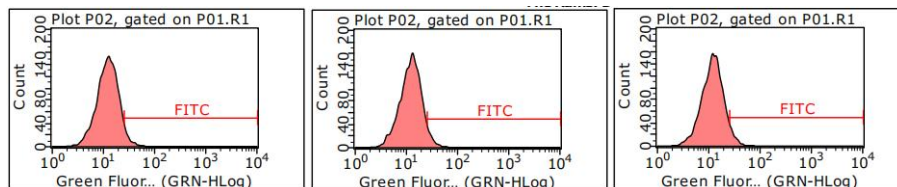

Inhibitor

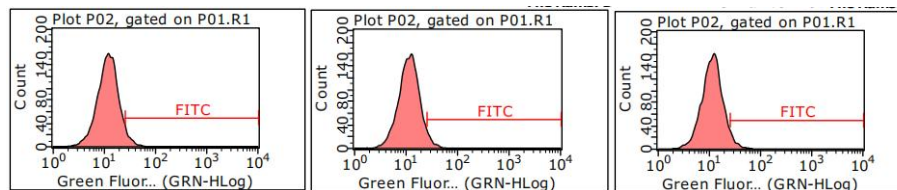

CD86

Mimics NC

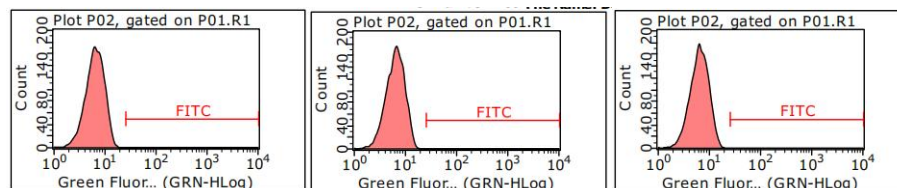

Mimics

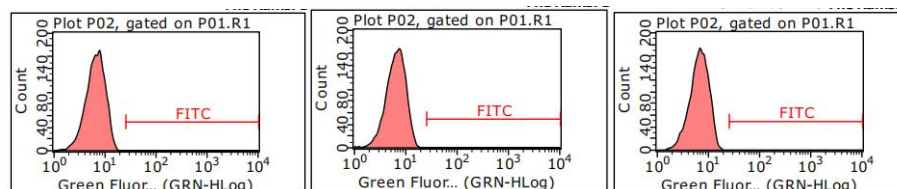

Inhibitor NC

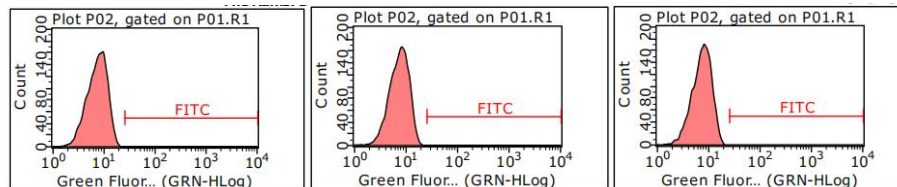

Inhibitor

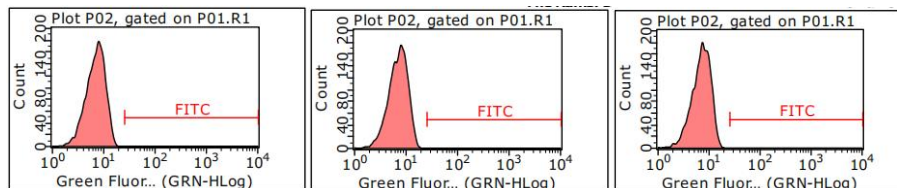

CD206

## Mimics NC

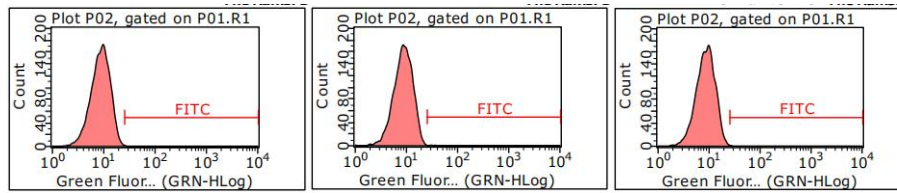

## Mimics

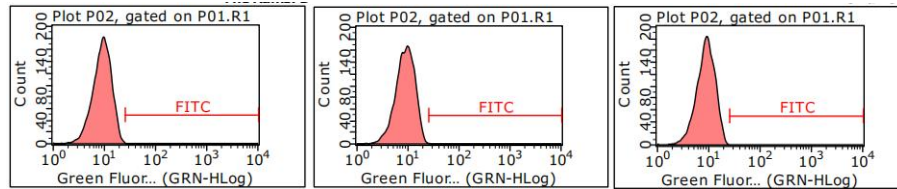

## Inhibitor NC

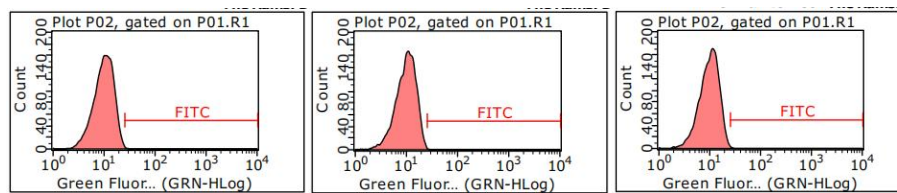

## Inhibitor

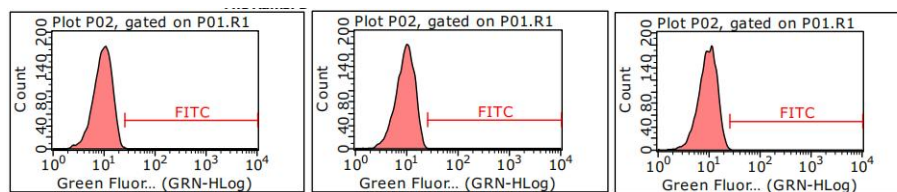

Supplement: raw_data.zip [file raw_data.zip]
