# Supplementary material for: Bone marrow mesenchymal stem cell-derived exosomal microRNA regulates microglial polarization
Source: PeerJ journal article supplement (doi:10.7717/peerj.16359), 2023-11-09

1C

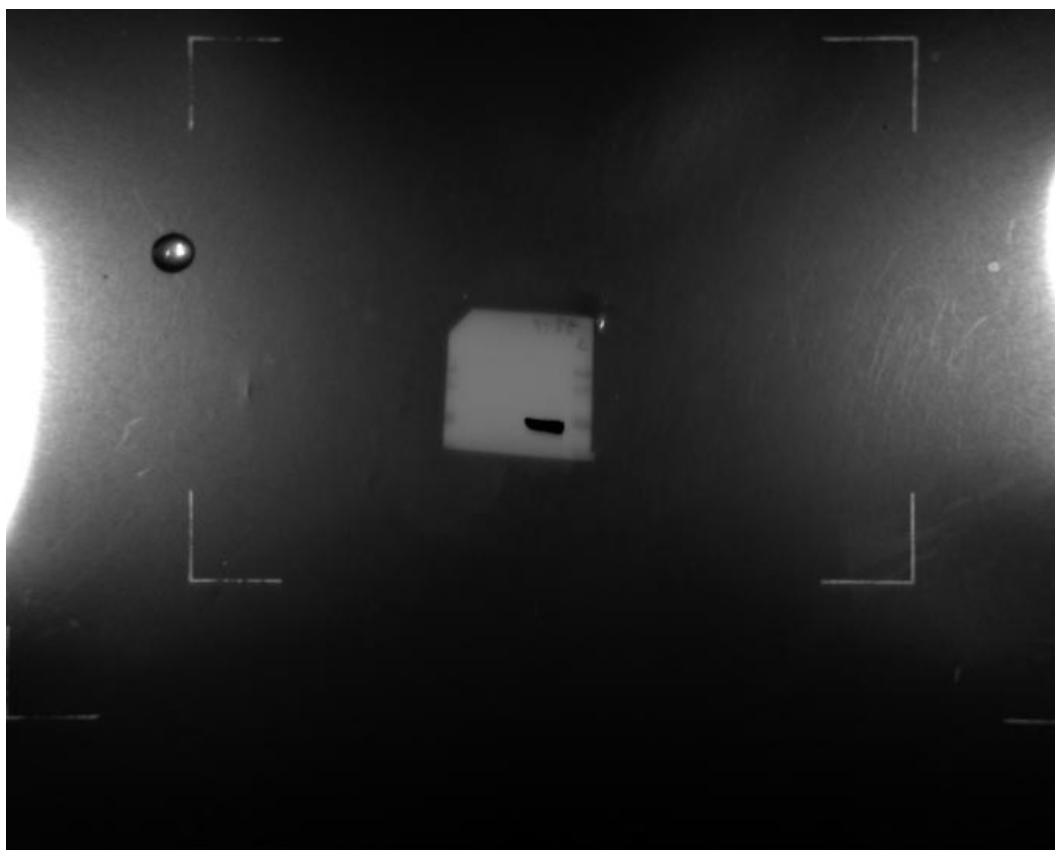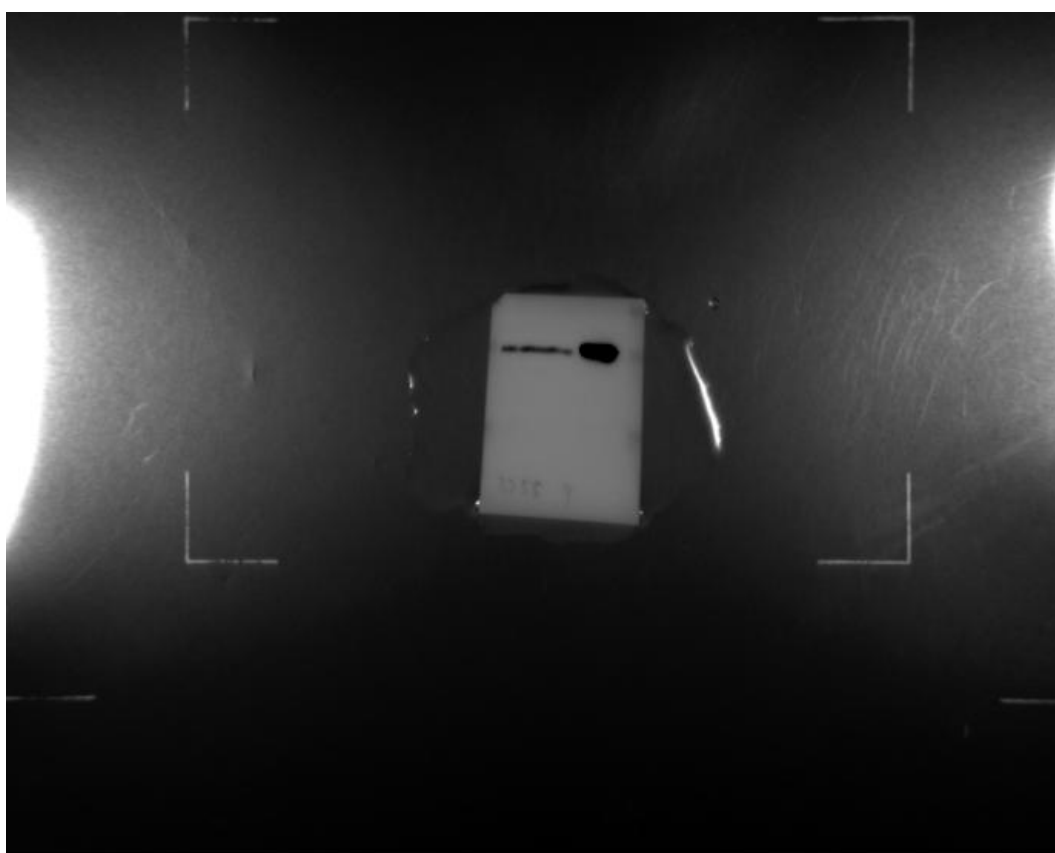

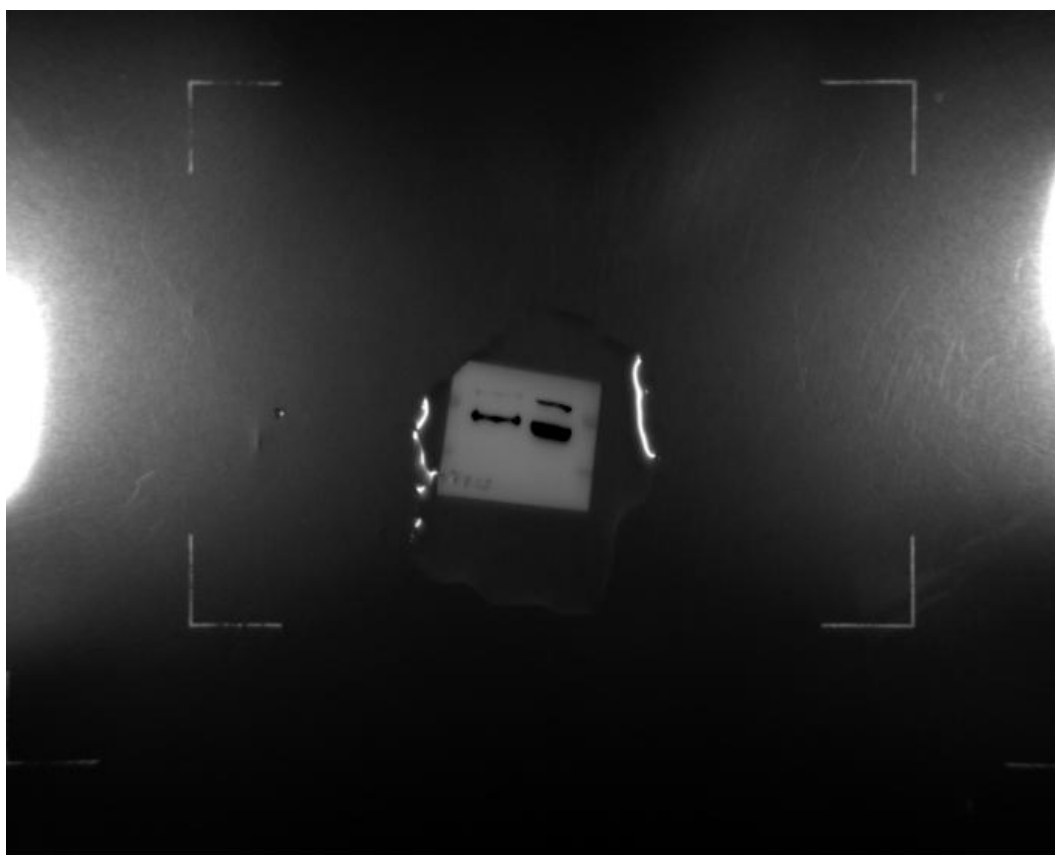

7C

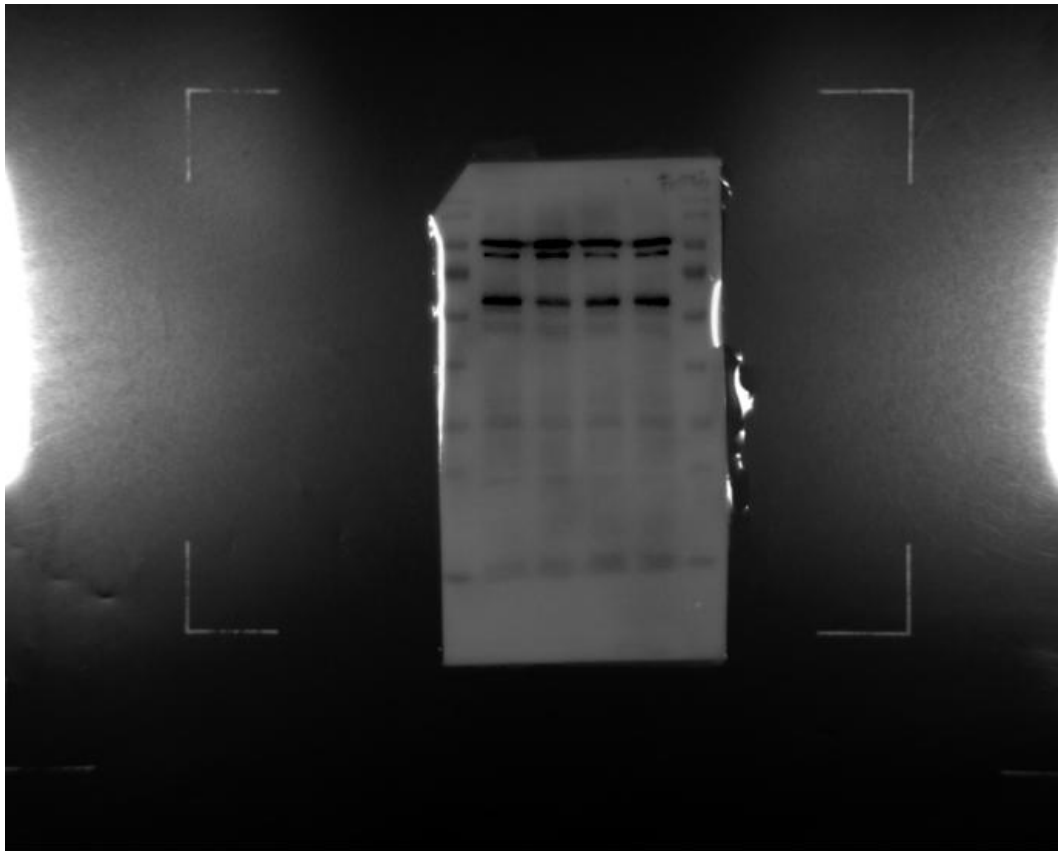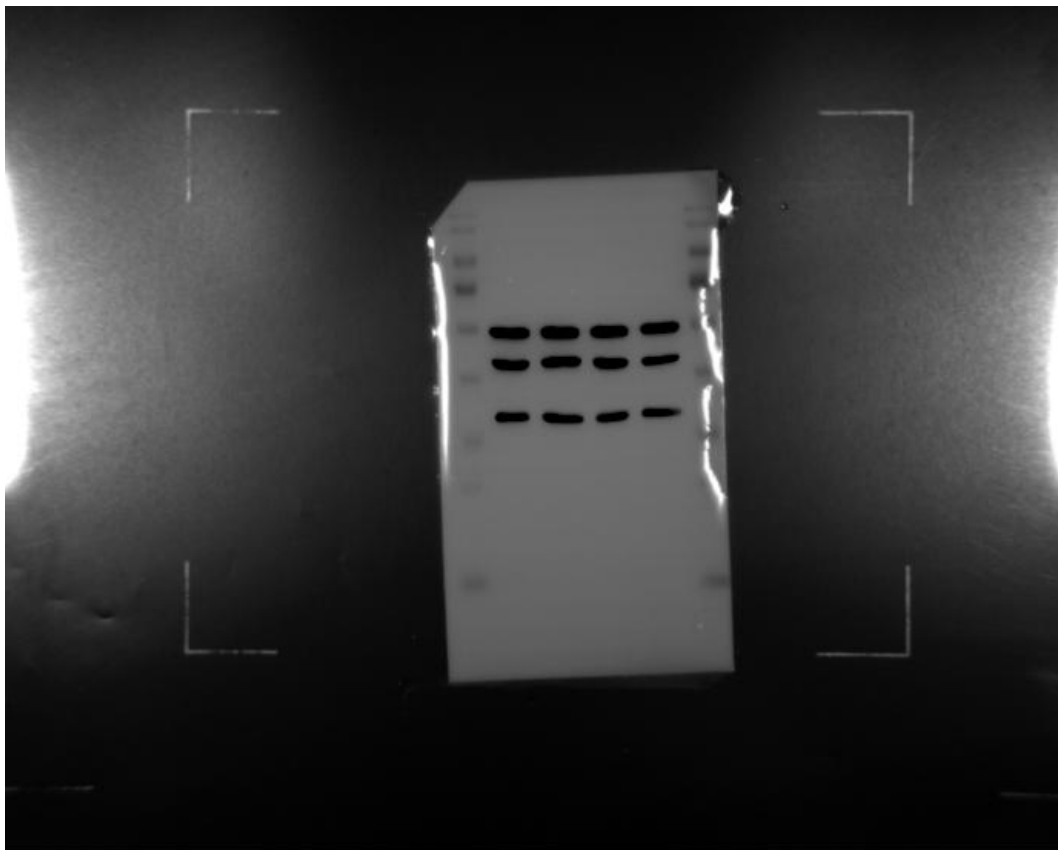

Supplement: original_images_of_western_blots.pdf [file original_images_of_western_blots.pdf]
