# Supplementary material for: Bone marrow mesenchymal stem cell-derived exosomal microRNA regulates microglial polarization
Source: PeerJ journal article supplement (doi:10.7717/peerj.16359), 2023-11-09

C

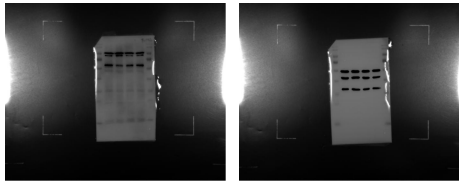

D

Control

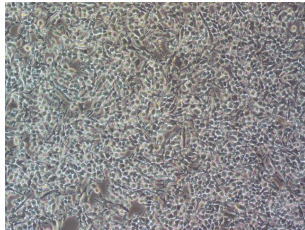

Sh Traf6-1

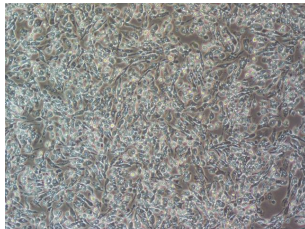

Sh Traf5-2

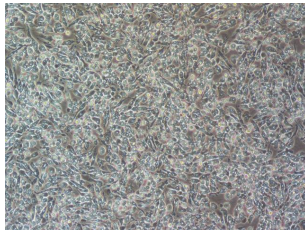

Sh Traf6-3

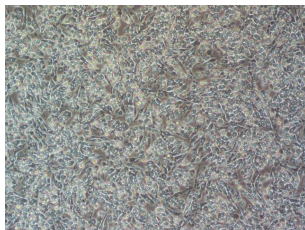

F

Mimics + oe-NC

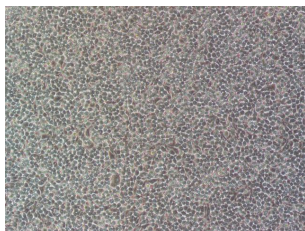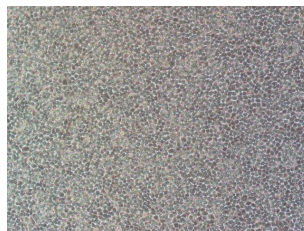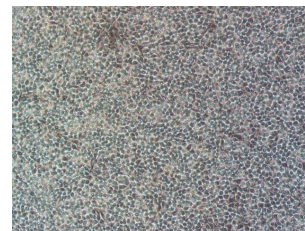

Mimics + oe-Traf6

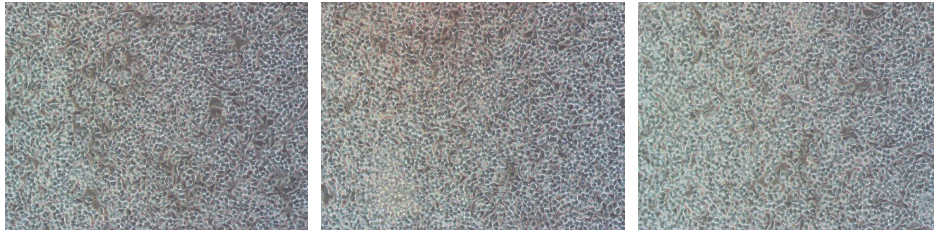

Inhibitor + sh-NC

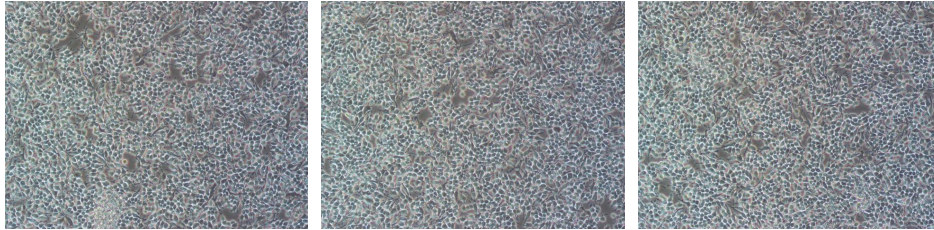

Inhibitor + shTraf6-1

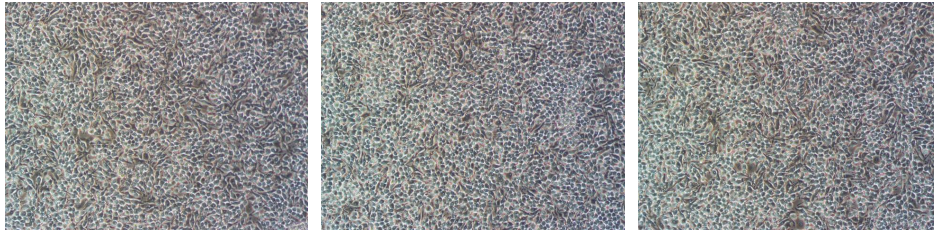

Inhibitor + shTraf6-2

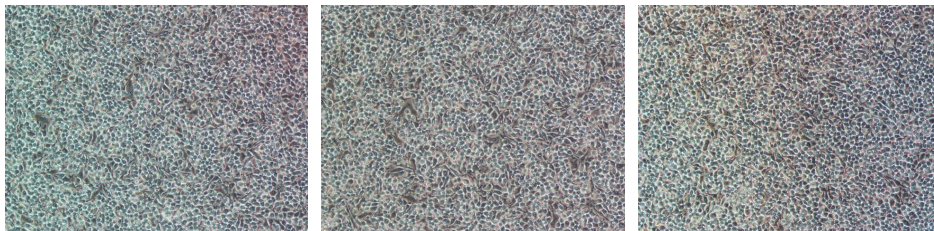

Supplement: raw_data.zip [file raw_data.zip]
