# Supplementary material for: Bone marrow mesenchymal stem cell-derived exosomal microRNA regulates microglial polarization
Source: PeerJ journal article supplement (doi:10.7717/peerj.16359), 2023-11-09

**A**

Control

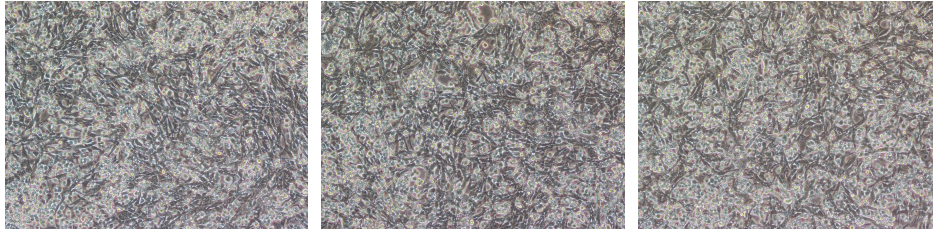

OGD

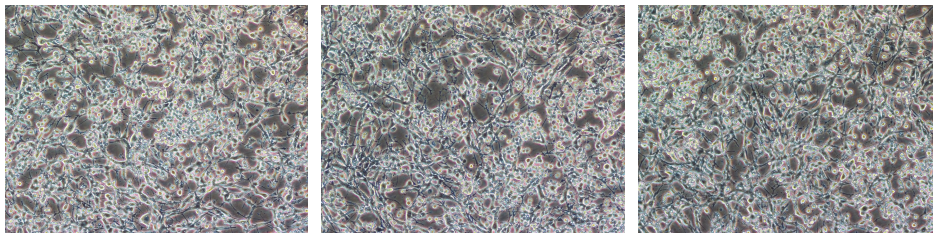

OGD + exo

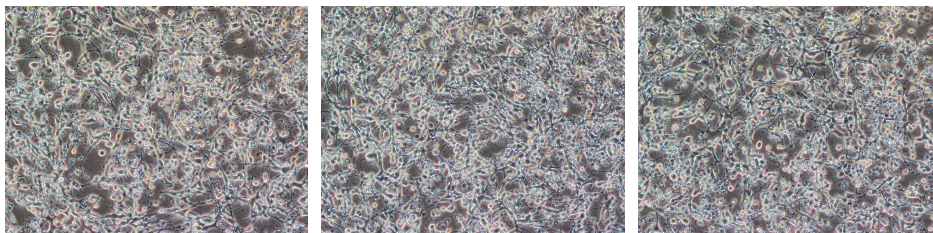

**B**

Control

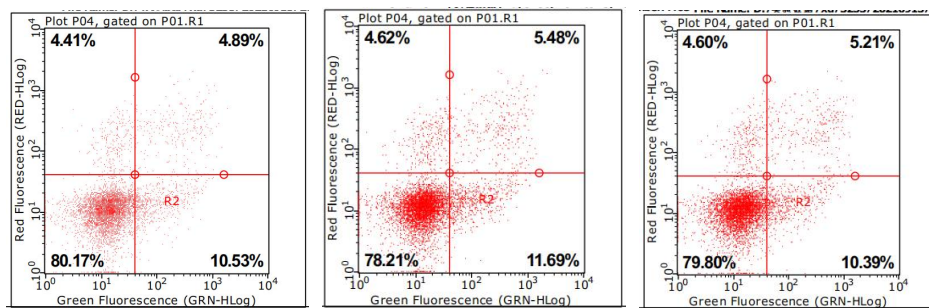

OGD

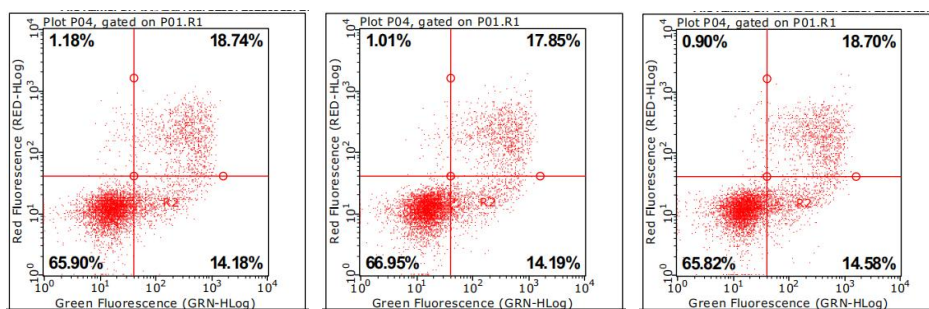

OGD + exo

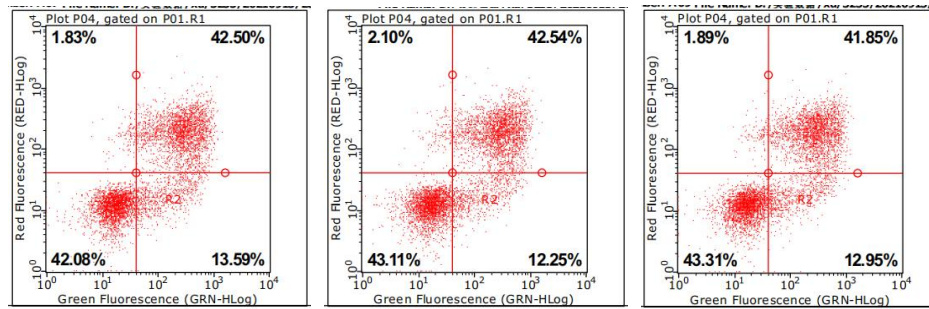

**C**

**CD40**

Control

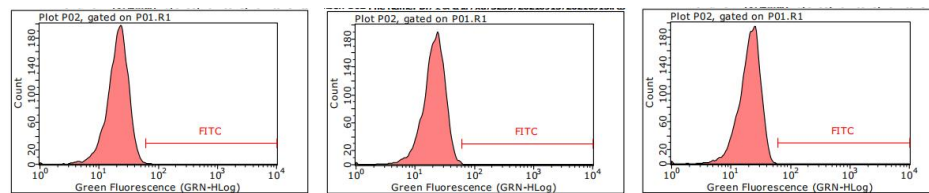

OGD

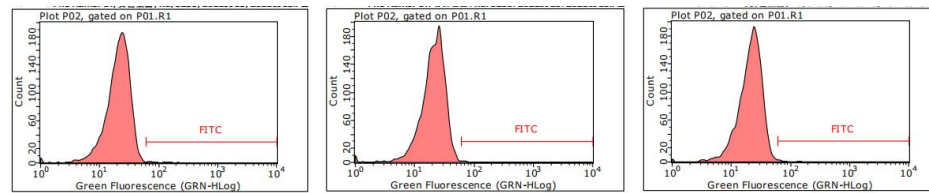

OGD + exo

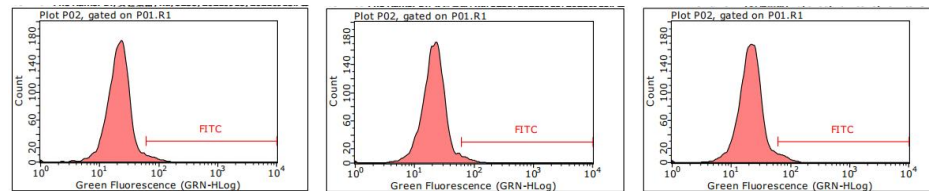

**CD86**

Control

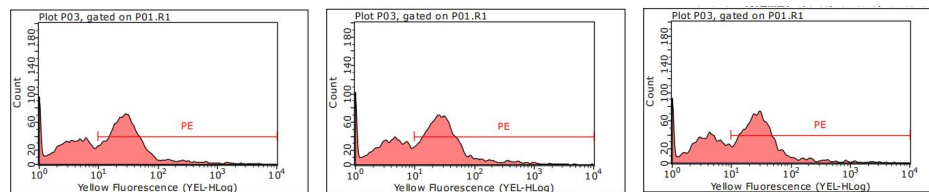

OGD

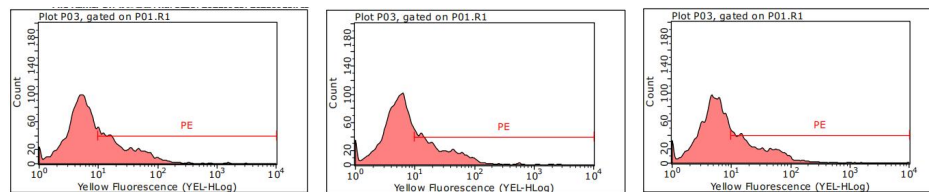

OGD + exo

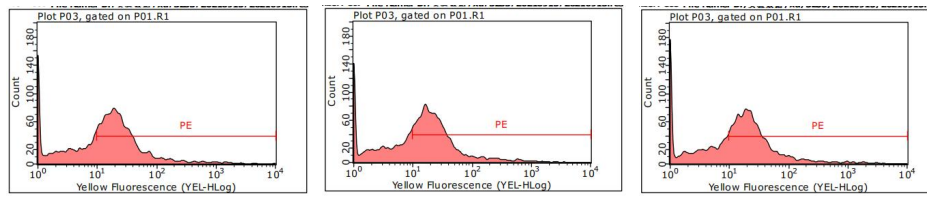

**CD206**

Control

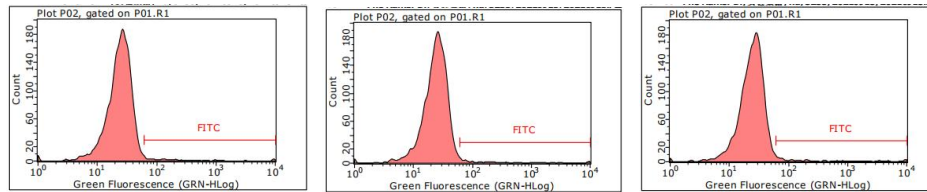

OGD

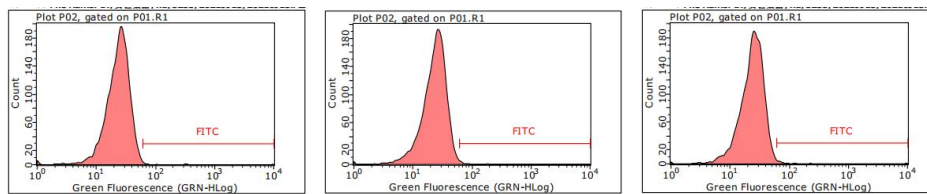

OGD + exo

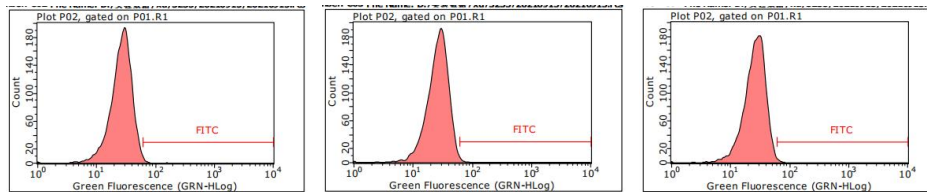

Supplement: raw_data.zip [file raw_data.zip]
