# Supplementary figures and images for: Bone marrow mesenchymal stem cell-derived exosomal microRNA regulates microglial polarization
Source: PeerJ journal article supplement (doi:10.7717/peerj.16359), 2023-11-09

A

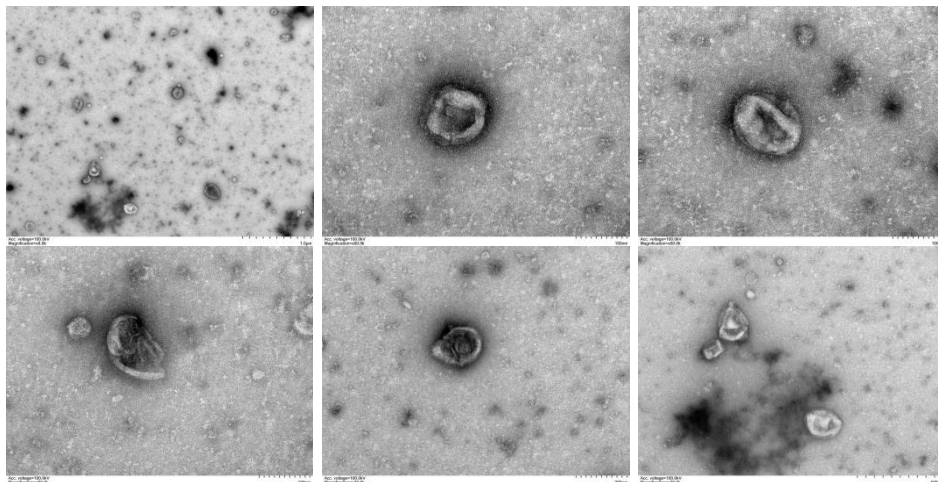

B

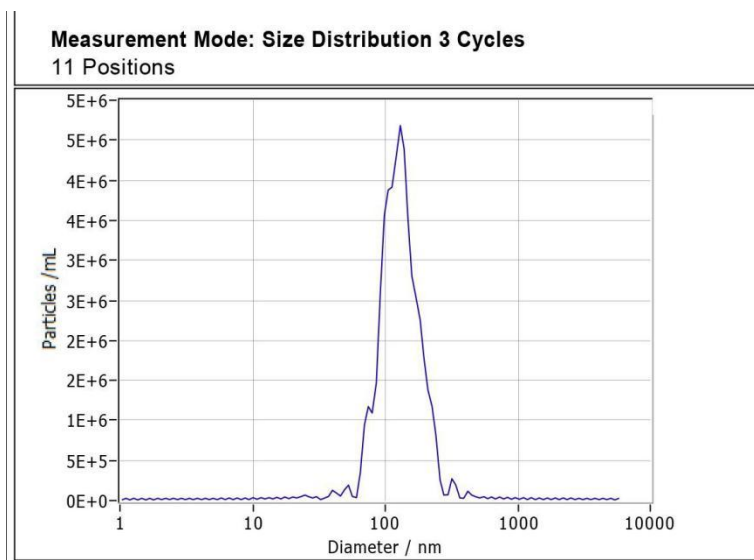

C

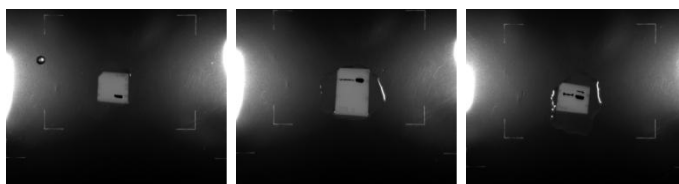

D

Control

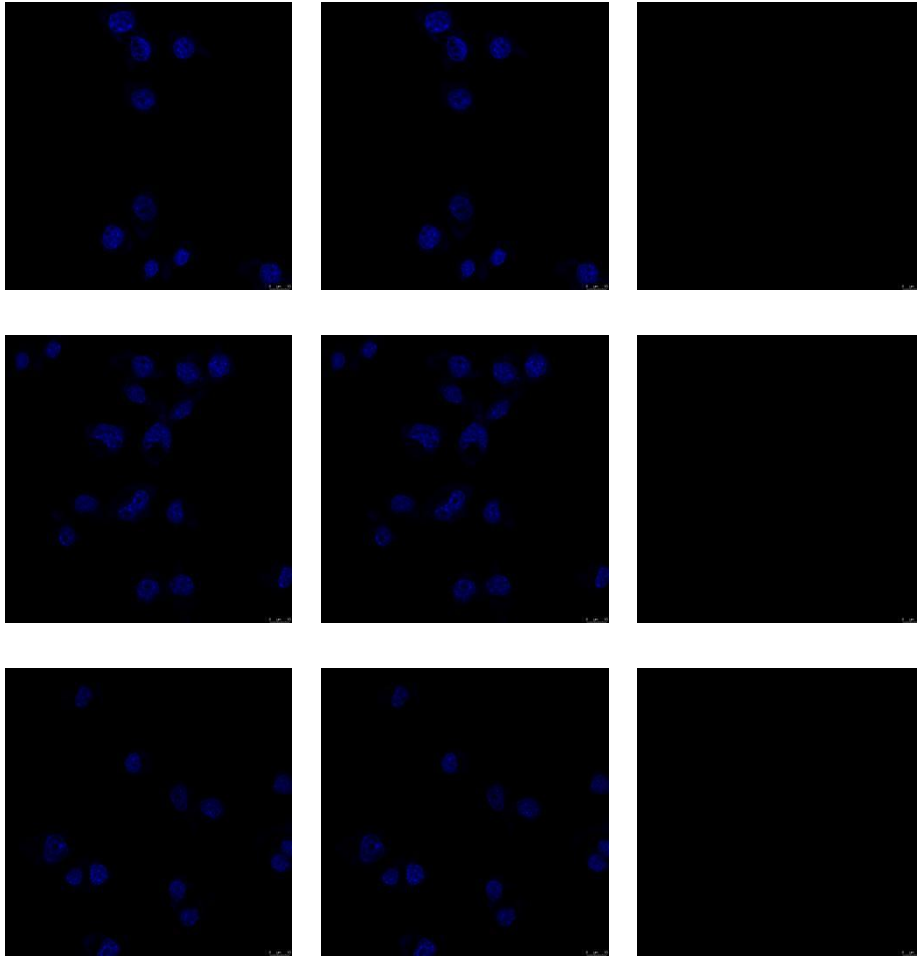

Exo

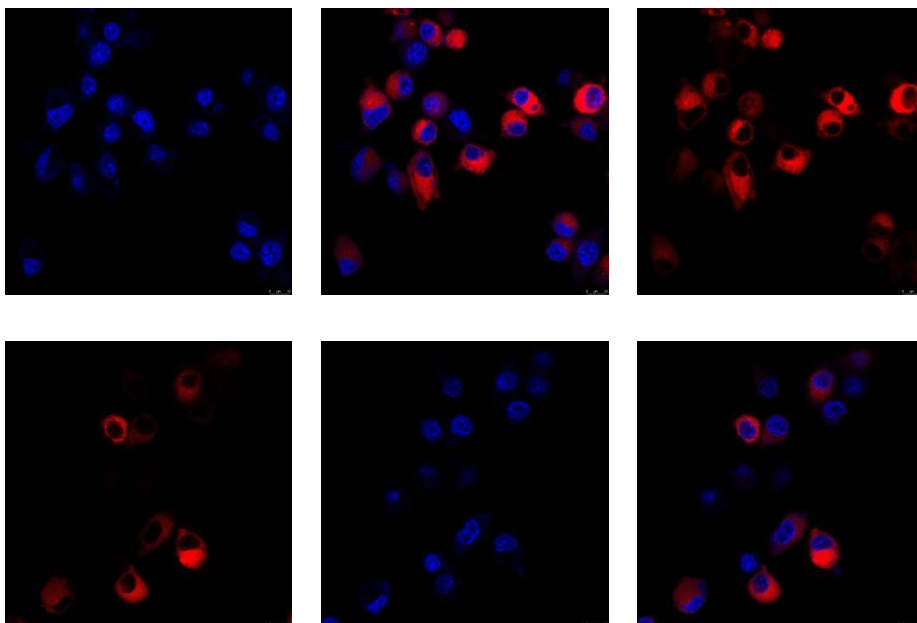

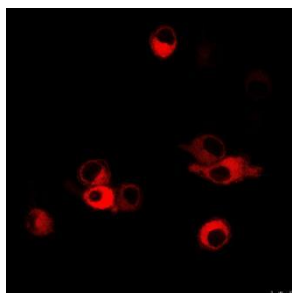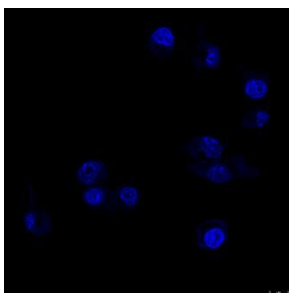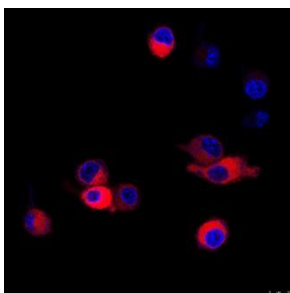

Supplement: raw_data.zip [file raw_data.zip]
